# Supplementary material for: A simple flash and freeze system for cryogenic time-resolved electron microscopy
Source: Frontiers journal article supplement (doi:10.3389/fmolb.2023.1129225), 2023-03-07
Supplement: Table_1.XLSX [file Table_1.XLSX]

## Sheet: Sheet1
TABLE 1: Exemplary photoactive compounds/proteins and associated photophysical properties.
Compound/System	ε (M-1cm-1 )	Peak Abs (nm)	Quantum yield	Required Power (mW/cm2)
NPE caged Proton (1-(2-Nitrophenyl)ethyl sulfate sodium)	3000	335	0.47	104
N-[(a-carboxy)-2-nitrobenzyl] carbamoylcholine	500	350	0.8	371
DMNPE ATP	5300	354	0.63	44
DM-nitrophenyl Calcium	4330	350	0.18	191
4‐methoxy‐7‐nitroindolinyl (MNI) Glutamate	4820	336	0.085	378
Channel Rhodopsin	50000	480	0.67	3.6
Bacteriorhodopsin	63000	568	0.64	2.3
Cryptochrome, Cry2	5000	380	0.213	128
PhoCl photocleavable protein	34000	488	0.73	4.3
Azobenzene (trans-cis)	21000	310	0.11	73
3’,5’-bis(carboxymethoxy)benzoin	252	320	0.64	1010
