# Supplementary material for: A simple flash and freeze system for cryogenic time-resolved electron microscopy
Source: Frontiers journal article supplement (doi:10.3389/fmolb.2023.1129225), 2023-03-07
Supplement: Table_2.XLSX [file Table_2.XLSX]

## Sheet: Sheet1
TABLE 2: Skin depth penetration calculations
	Skin depth, nm		Pd/Pi
	365 nm	450 nm	365 nm	450 nm
Copper	2.3	2.6	0.08	0.071
Gold	2.7	3	0.094	0.085
