# Supplementary material for: A simple flash and freeze system for cryogenic time-resolved electron microscopy
Source: Frontiers journal article supplement (doi:10.3389/fmolb.2023.1129225), 2023-03-07
Supplement: Table_3.XLSX [file Table_3.XLSX]

## Sheet: Sheet1
TABLE 3: Finite conductivities of copper and gold
	% Reflectivity (365 nm, 3.4 eV)	% Reflectivity (450 nm, 2.75 eV)	Plasma Frequency (X 1015 Hz), [Wavelength, nm]	Collision Frequency (X 1012 Hz), [Wavelength, µm]	Fermi Energy (EF), eV	Valence d-band (EF-Ed), eV	Conductivity, (S/m)	Heat Capacity, J/Kg.oC	Density, Kg/m3
Copper	42	54	2.614, [115]	6.55, [45.7]	7	2	5.8 X 107	377	8960
Gold	36	37	2.178, [138]	6.42, [46.7]	5.5	2.5	4.1 X 107	129	19300
