# Supplementary material for: A simple flash and freeze system for cryogenic time-resolved electron microscopy
Source: Frontiers journal article supplement (doi:10.3389/fmolb.2023.1129225), 2023-03-07
Supplement: Table_4.XLSX [file Table_4.XLSX]

## Sheet: Sheet1
TABLE 4: Optical train components
Part	VitroBot Mark IV	Leica GP2
Arduino Nano board (Arduino.cc)	ü	ü
Digital-to-analog converter (MCP4822, Microchip Inc.)	ü	ü
LED driver (RCDE-48-1.05, Recom Power GmbH)	ü	ü
ILI9341 2.8" SPI TFT LCD Display (Amazon.com)	ü	ü
Bus Transceiver (SN74LVC245ANE4, Texas Instruments Inc.)	ü	ü
Photointerrupter (RPR-220, ROHM Co.)		ü
Kinematic Pitch/Yaw Adapter (KAD11NT, THORLABS Inc.)		ü
3D Printed Wall adapter (Fits sample loading port, Custom designed, stl files in supplementary)	ü	ü
Liquid Light-guide (805-00038, Excelitas Technologies Corp.)	ü	ü
6 V DC power supply (Mouser Electronics Inc.)	ü	ü
24 V DC power supply (Mouser Electronics Inc.)	ü	ü
ABS Plastic Enclosure (B075WZRW75, Amazon.com)	ü	ü
Aspheric Lens (ACL12708U-A, THORLABS Inc.)	ü	ü
Threaded Adapter (AD9F, THORLABS Inc.)	ü
Lens Tube (SM1M10, THORLABS Inc.)	ü
External thread to optic adapter (SM05P05, THORLABS Inc.)	ü
Adapter with external and internal thread (SM1A6, THORLABS Inc.)	ü
LED (365 nm, LZ4-44UV00-0000, AMS OSRAM AG)	ü	ü
LED mount and heat sink (M375L4, THORLABS Inc.)	ü	ü
Threaded adapter (AD12F, THORLABS Inc.)	ü	ü
Lens tube (SM1L10, THORLABS Inc.)	ü	ü
Cooling fan (CFM-5010V-052-300, Mouser Electronics Inc.)	ü	ü
